# Supplementary material for: Self-assembly of iodoacetylenyl-substituted nitronyl nitroxides via halogen bonding
Source: Royal Society of Chemistry journal article supplement (doi:10.1039/d3ce00735a), 2023-01-01
Supplement: d3ce00735a1.pdf [file d3ce00735a1.pdf]

## *Electronic Supplementary Information for*

# **Self-assembly of Iodoacetylenyl-substituted Nitronyl Nitroxides via Halogen Bonding**

Matvey K. Shurikov,<sup>a</sup> Evgeny V. Tretyakov,<sup>\*b</sup> Pavel V. Petunin,<sup>\*a</sup> Darya E. Votkina,<sup>a</sup> Galina V. Romanenko,<sup>c</sup> Artem S. Bogomyakov,<sup>c</sup> Sergi Burguera,<sup>d</sup> Antonio Frontera,<sup>d</sup> Vadim Yu. Kukushkin,<sup>e</sup> Pavel S. Postnikov<sup>a</sup>

- 
- a M. K. Shurikov, Dr. P. V. Petunin, D. E. Votkina, Prof. Dr. P. S. Postnikov  
Research School of Chemistry & Applied Biomedical Sciences  
Tomsk Polytechnic University  
Lenin Av. 30, Tomsk 634050, Russian Federation  
E-mail: petuninpavel@tpu.ru
- b Prof. Dr. E. V. Tretyakov  
N.D. Zelinsky Institute of Organic Chemistry, Russian Academy of Sciences  
Leninsky Av. 47, Moscow 119991, Russian Federation  
E-mail: tretyakov@ioc.ac.ru
- c Prof. Dr. G. V. Romanenko, Dr. A. S. Bogomyakov  
International Tomography Center, Siberian Branch of Russian Academy of Sciences  
Institutskaya Str. 3a, Novosibirsk 630090, Russian Federation
- d S. Burguera, Prof. Dr. A. Frontera  
Departament de Química  
Universitat de les Illes Balears  
Crta de Valldemossa km 7.5, 07122 Palma de Mallorca (Balears), Spain
- e Prof. Dr. V. Yu. Kukushkin  
Institute of Chemistry  
Saint Petersburg State University  
Universitetskaya Nab. 7/9, Saint Petersburg 199034, Russian Federation

## **Table of content**

|                                                                                 |   |
|---------------------------------------------------------------------------------|---|
| <b>Section S1. A CSD search for self-assembled halogenated nitroxides</b> ..... | 2 |
| <b>Section S2. UV-Vis spectra</b> .....                                         | 5 |
| <b>Section S3. CW EPR spectra</b> .....                                         | 7 |
| <b>Section S4. NMR spectra</b> .....                                            | 8 |

## Section S1. A CSD search for self-assembled halogenated nitroxides

A search in the Cambridge Structural Database revealed a series of halogen-substituted nitroxides, whose XRD structures featuring C–Hal $\cdots$ O<sub>NO</sub> short contacts. In 2-chloro-5-fluorophenyl-substituted benzimidazol-1-yl *N,N'*-dioxide (**I**), the assembly led to occurrence of centrosymmetric dimers exhibiting Cl $\cdots$ O XB (3.155 Å, Nc = 0.96) (**Figure 1**; see figure legend for the definition of Nc).<sup>1</sup>

Crystal structure analysis of different type of brominated nitroxides (**II–V**) revealed infinite 1D-chains halogen-bonded by C–Br $\cdots$ O<sub>NO</sub> contacts (Nc < 1; **Figure 1**).<sup>2–5</sup> Notably, very short C–Br $\cdots$ O<sub>NO</sub> contacts (2.809 Å;  $\Sigma_{vdW} = 3.37$  Å) were found in crystals of hybrid phenoxy-nitroxide radical (**II**).<sup>5</sup> A special case is the solid-state structure of dibromo-derivative (**VI**), which is assembled by NCIs (3.034 Å) of a nitroxide O-atom with Br-atoms of different radicals; this assembly leads to occurrence of 2D-layered architectures.<sup>6</sup> Moreover, in crystals of dibrominated benzo-TTF bearing nitronyl nitroxide (**VII**), the molecules are arranged in a square-like manner by Br $\cdots$ S intermolecular contacts (approx. 3.6 Å) between one of the Br-atoms and a S-atom of the benzodithiole ring; each remaining Br forms a very short contact (2.901 Å) with the nitroxide O-atom from a neighboring molecule.<sup>7</sup>

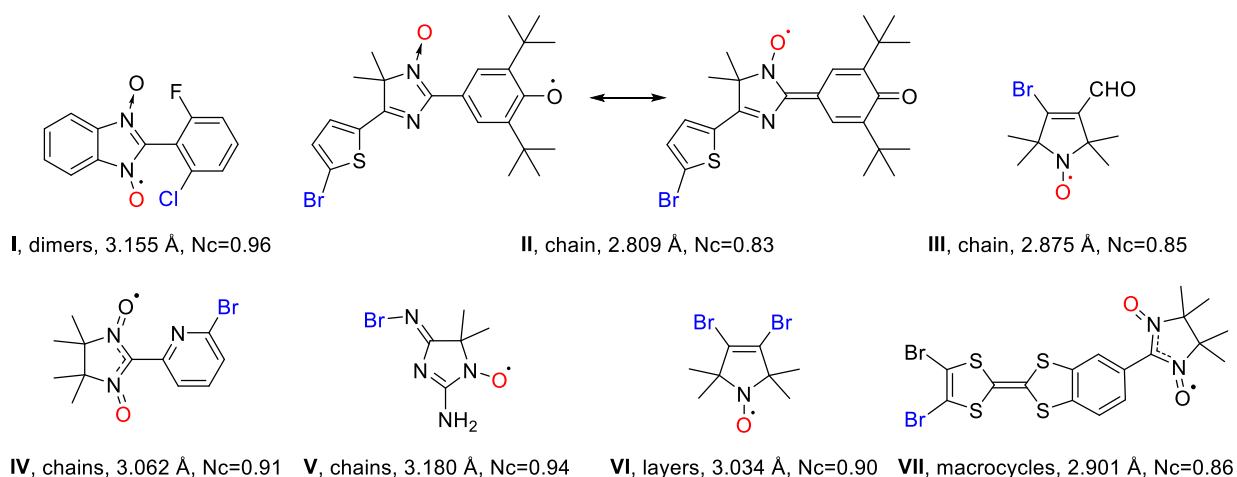

**Figure S1.** Halogen-substituted nitroxides **I–VII** of different types assembled by C–Hal $\cdots$ O<sub>NO</sub> short contacts (interacted atoms are colored; motif of packing in crystals based on C–X $\cdots$ O<sub>NO</sub> short contacts as well as X $\cdots$ O distances are indicated). The “normalized contact” Nc for interacted atoms i and j is defined as the ratio  $D_{ij}/(r_{vdW,i} + r_{vdW,j})$  wherein  $D_{ij}$  is the experimentally determined distance between atoms i and j and  $r_{vdW,i}$  and  $r_{vdW,j}$  are Bondi<sup>8</sup> van der Waals radii of i and j.

In the crystal state, iodo-substituted nitroxides are prone to form XBs between nitroxide O-atoms and halogen sites to give, in most cases, 1D-chains, in which  $I \cdots O_{NO}$  distances are considerably shorter than  $\Sigma_{vdW}$  (3.50 Å; **Figure 2**).<sup>9–11</sup> In crystals of triiodo-derivative **XI**, we observed short intermolecular contacts of two types,  $I \cdots O_{NO}$  and  $I \cdots O_{CO}$ , that assemble the structure in 2D-layers.<sup>12</sup> Finally, 2-chloro, 2-bromo, and 2-iodo nitronyl nitroxides **XIV–XVI** give isomorphous crystal structures consisting of chains linked by  $Hal \cdots O_{NO}$  XB (**Figure 2**).<sup>13–15</sup>

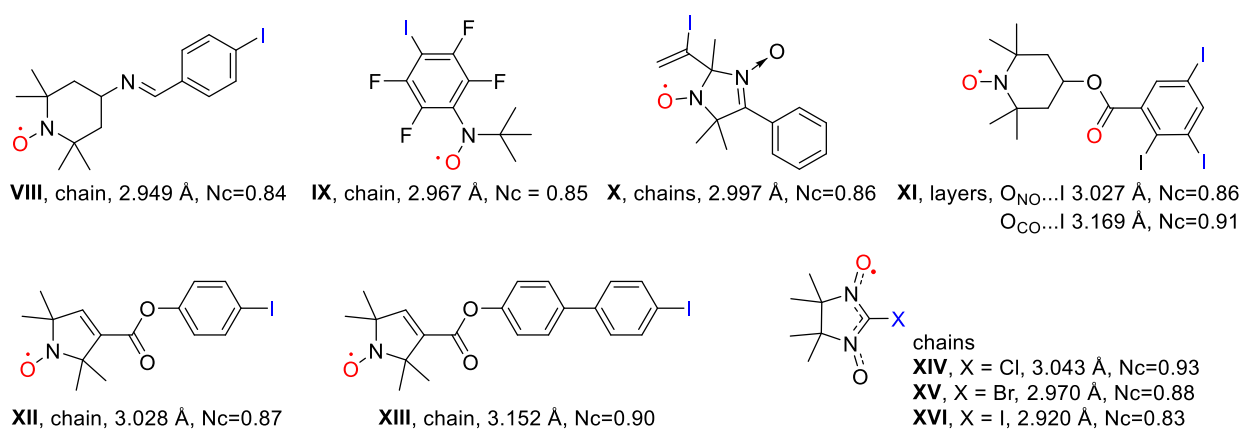

**Figure S2.** Iodo-substituted nitroxides **VIII–XVI** featuring  $I \cdots O_{NO}$  short contacts (interacted atoms are colored; motif of packing of radicals in crystals based on  $C-X \cdots O_{NO}$  short contacts;  $X \cdots O$  distances are indicated).

## References:

- 1 A. Zakrassov, V. Shteiman, Y. Sheynin, B. Tumanskii, M. Botoshansky, M. Kapon, A. Keren, M. Kaftory, T. E. Vos and J. S. Miller, *J. Mater. Chem.*, 2004, **14**, 1827–1837.
- 2 M. A. Hollas, S. J. Webb, S. L. Flitsch and A. J. Fielding, *Angew. Chemie - Int. Ed.*, 2017, **56**, 9449–9453.
- 3 F. M. Romero, R. Ziessel, A. De Cian, J. Fischer and P. Turek, *New J. Chem.*, 1996, **20**, 919–924.
- 4 E. V. Tretyakov, A. S. Bogomyakov, E. Y. Fursova, G. V. Romanenko, V. N. Ikorskii and V. I. Ovcharenko, *Russ. Chem. Bull.*, 2006, **55**, 457–463.
- 5 E. Zaytseva, D. Shiomi, Y. Ten, Y. V. Gatilov, A. Lomanovich, D. Stass, A. Bogomyakov, A. Yu, K. Sugisaki, K. Sato, T. Takui, E. Bagryanskaya and D. Mazhukin, *J. Phys. Chem. A*, 2020, **124**, 2416–2426.
- 6 J. M. White and R. Chowdury, *CCDC structure No. 1960256 NOTWOL*, DOI:10.5517/ccdc.csd.cc23st2t.
- 7 H. Komatsu, M. M. Matsushita, S. Yamamura, Y. Sugawara, K. Suzuki and T. Sugawara, *J. Am. Chem. Soc.*, 2010, **132**, 4528–4529.
- 8 A. Bondi, *J. Phys. Chem.*, 1964, **68**, 441–451.
- 9 F. Iwasaki, J. H. Yoshikawa, H. Yamamoto, E. Kan-nari, K. Takada, M. Yasui, T. Ishida and T. Nogami, *Acta Crystallogr. Sect. B Struct. Sci.*, 1999, **55**, 231–245.
- 10 L. V. Politanskaya, P. A. Fedyushin, T. V. Rybalova, A. S. Bogomyakov, N. B. Asanbaeva and E. V. Tretyakov, *Molecules*, 2020, **25**, 5427.
- 11 L. G. Kuz'mina and Y. T. Struchkov, *J. Struct. Chem.*, 1987, **27**, 760–766.
- 12 T. Hauenschild, J. Reichenwallner, V. Enkelmann and D. Hinderberger, *Chem. - A Eur. J.*, 2016, **22**, 12825–12838.
- 13 E. V Tretyakov and V. I. Ovcharenko, *Russ. Chem. Rev.*, 2009, **78**, 971–1012.
- 14 Y. Hosokoshi, M. Tamura, K. Nozawa, S. Suzuki, M. Kinoshita, H. Sawa and R. Kato, *Synth. Met.*, 1995, **71**, 1795–1796.
- 15 Z.-L. Liu, S. Ye and C. Du, *CCDC structure No. 244384 TOLKOU01*, DOI:10.5517/cc869c3.

## Section S2. Powder XRD data

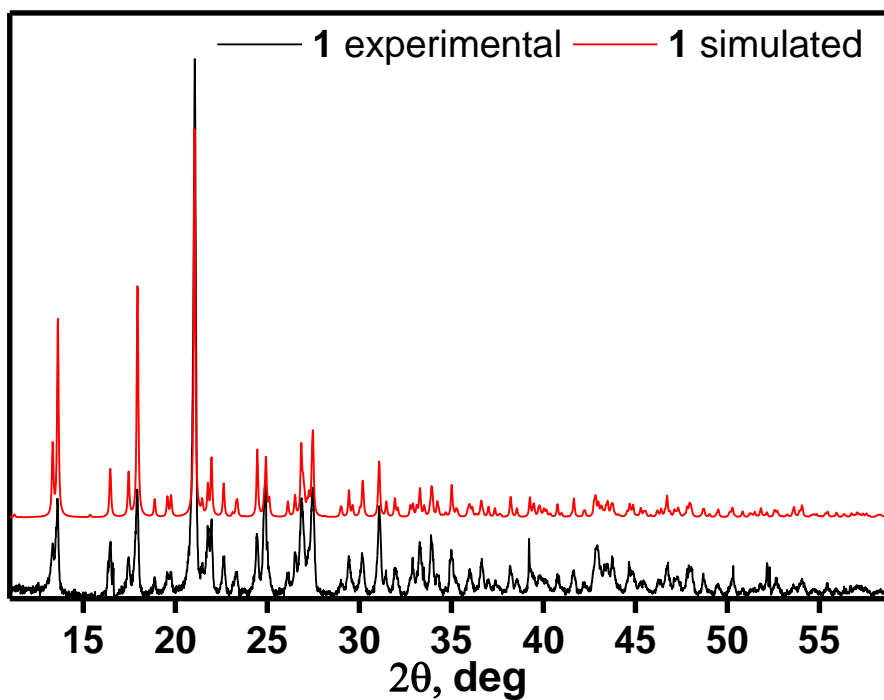

**Figure S3.** Experimental (black) and simulated (red) powder XRD pattern of nitroxide 1.

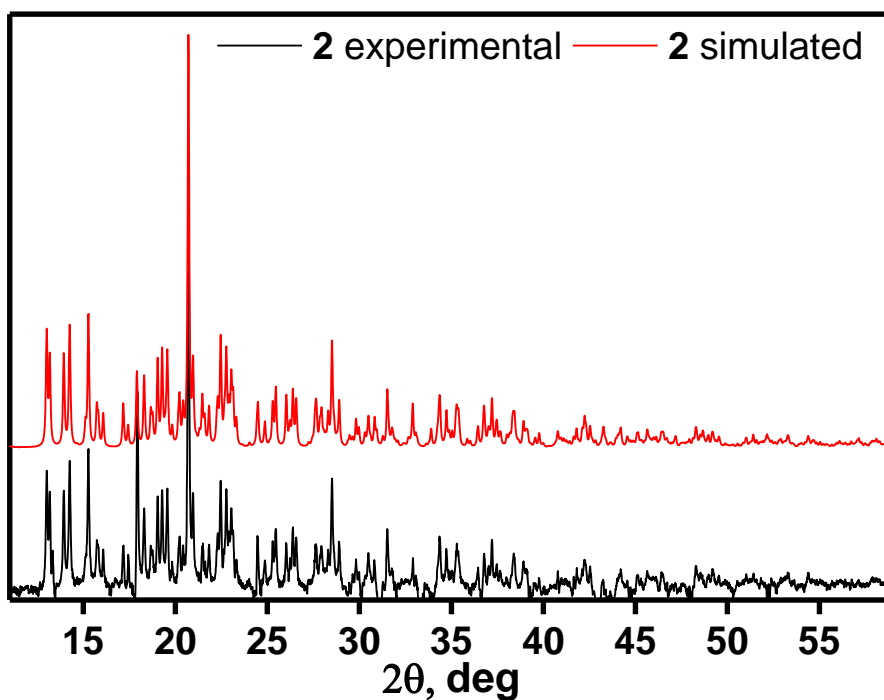

**Figure S4.** Experimental (black) and simulated (red) powder XRD pattern of nitroxide 2.

### Section S3. UV-Vis spectra

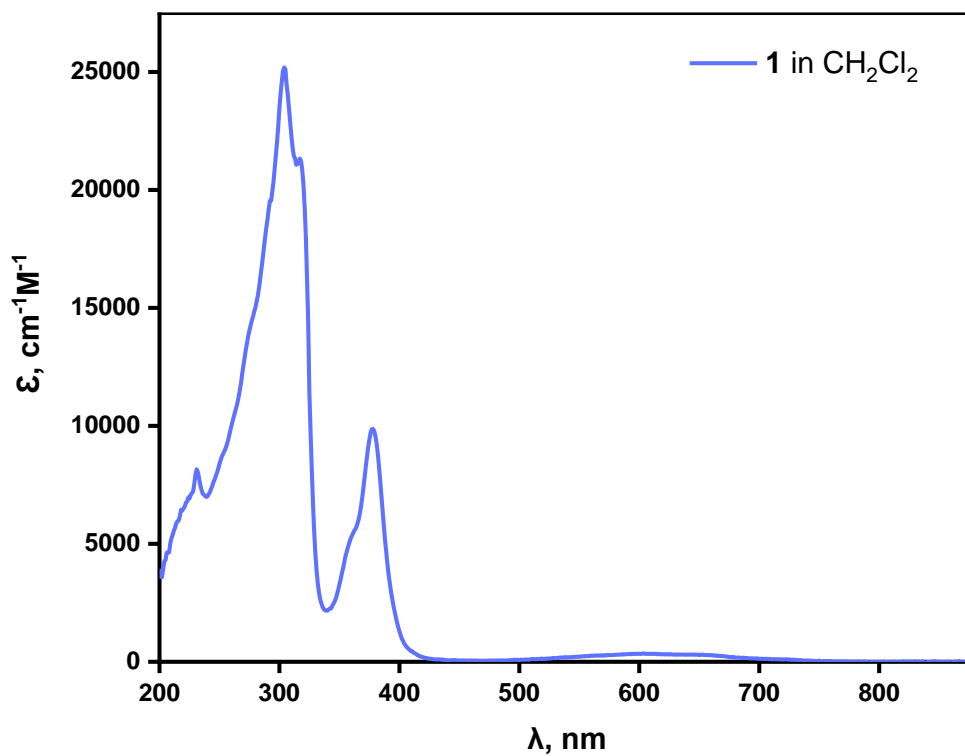

Figure S5. UV-Vis spectrum of **1** in  $\text{CH}_2\text{Cl}_2$ .

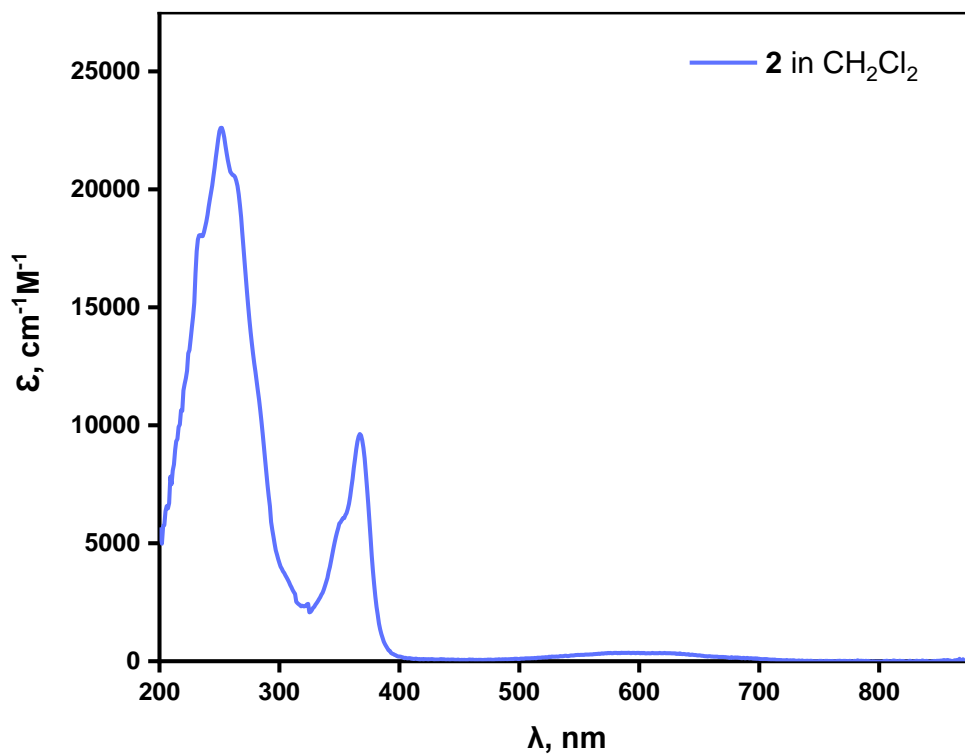

Figure S6. UV-Vis spectrum of **2** in  $\text{CH}_2\text{Cl}_2$ .

## Section S4. CW EPR spectra

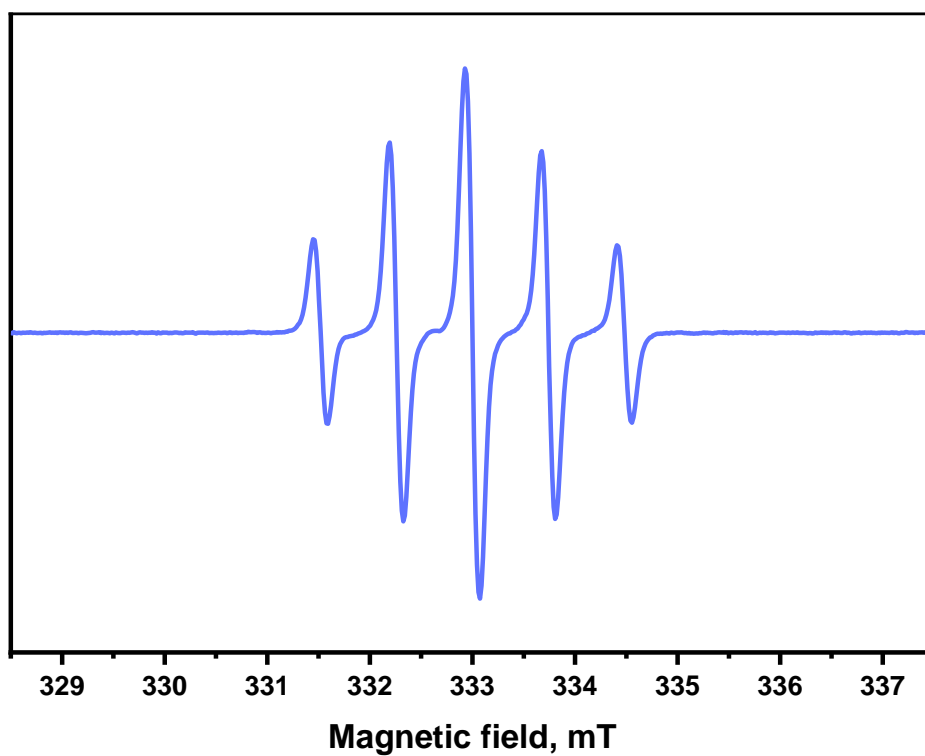

**Figure 7.** Experimental CW-ESR spectrum of **1** in deoxygenated toluene solution.

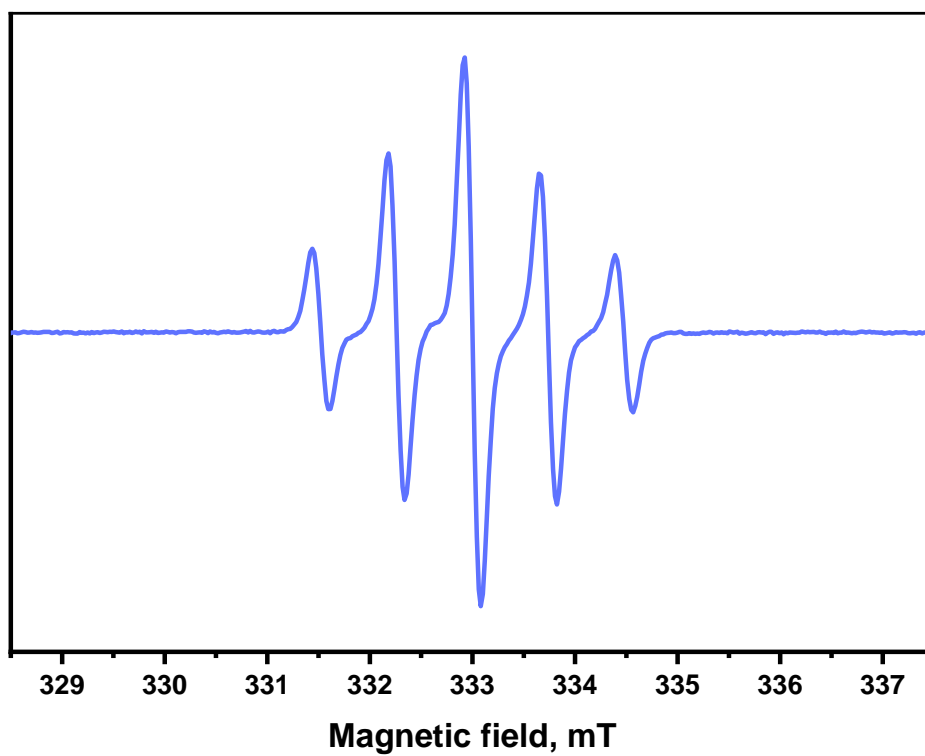

**Figure S8.** Experimental CW-ESR spectra of **2** in deoxygenated toluene solution.

## Section S5. NMR spectra

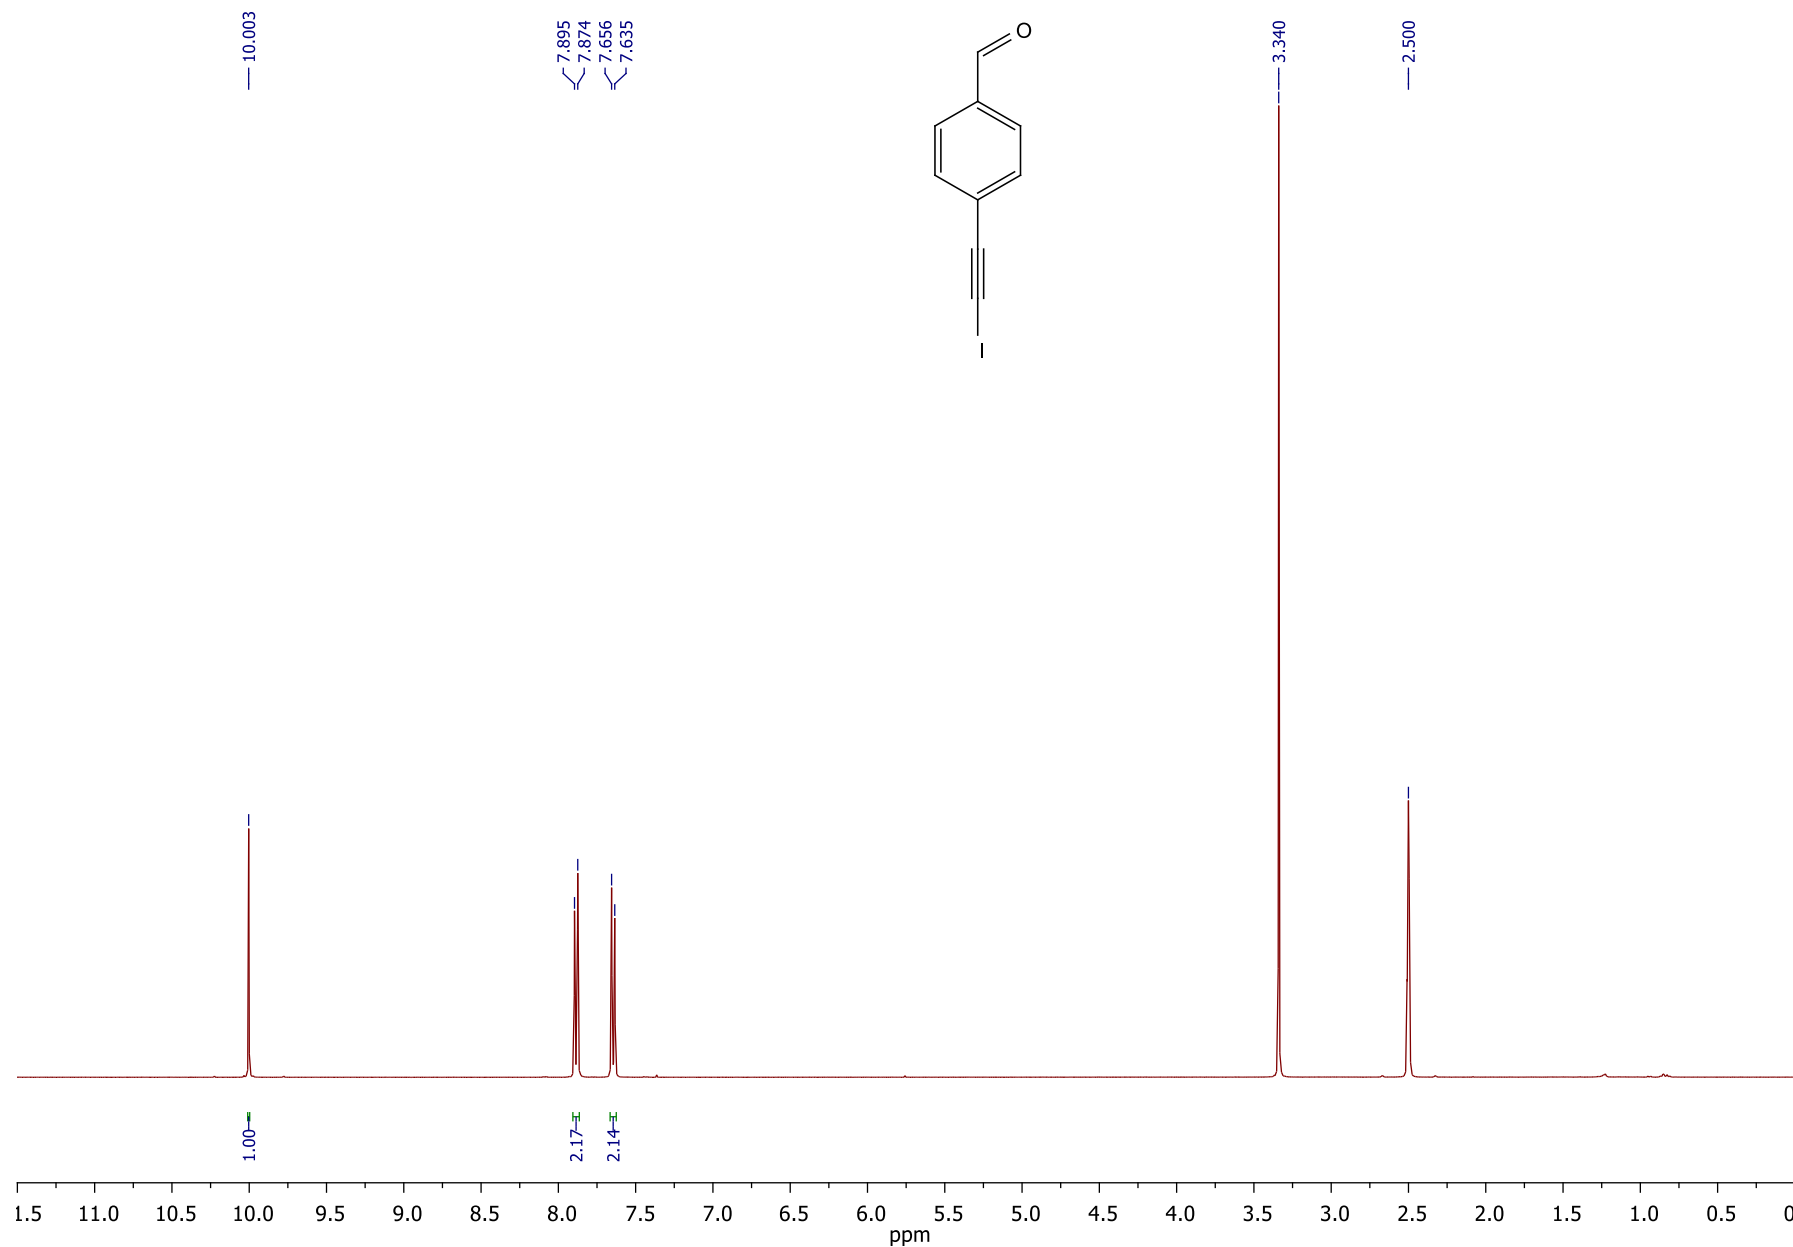

**Figure S9.** <sup>1</sup>H NMR spectrum (DMSO-d<sub>6</sub>) of 4-(iodoethynyl)benzaldehyde (7).



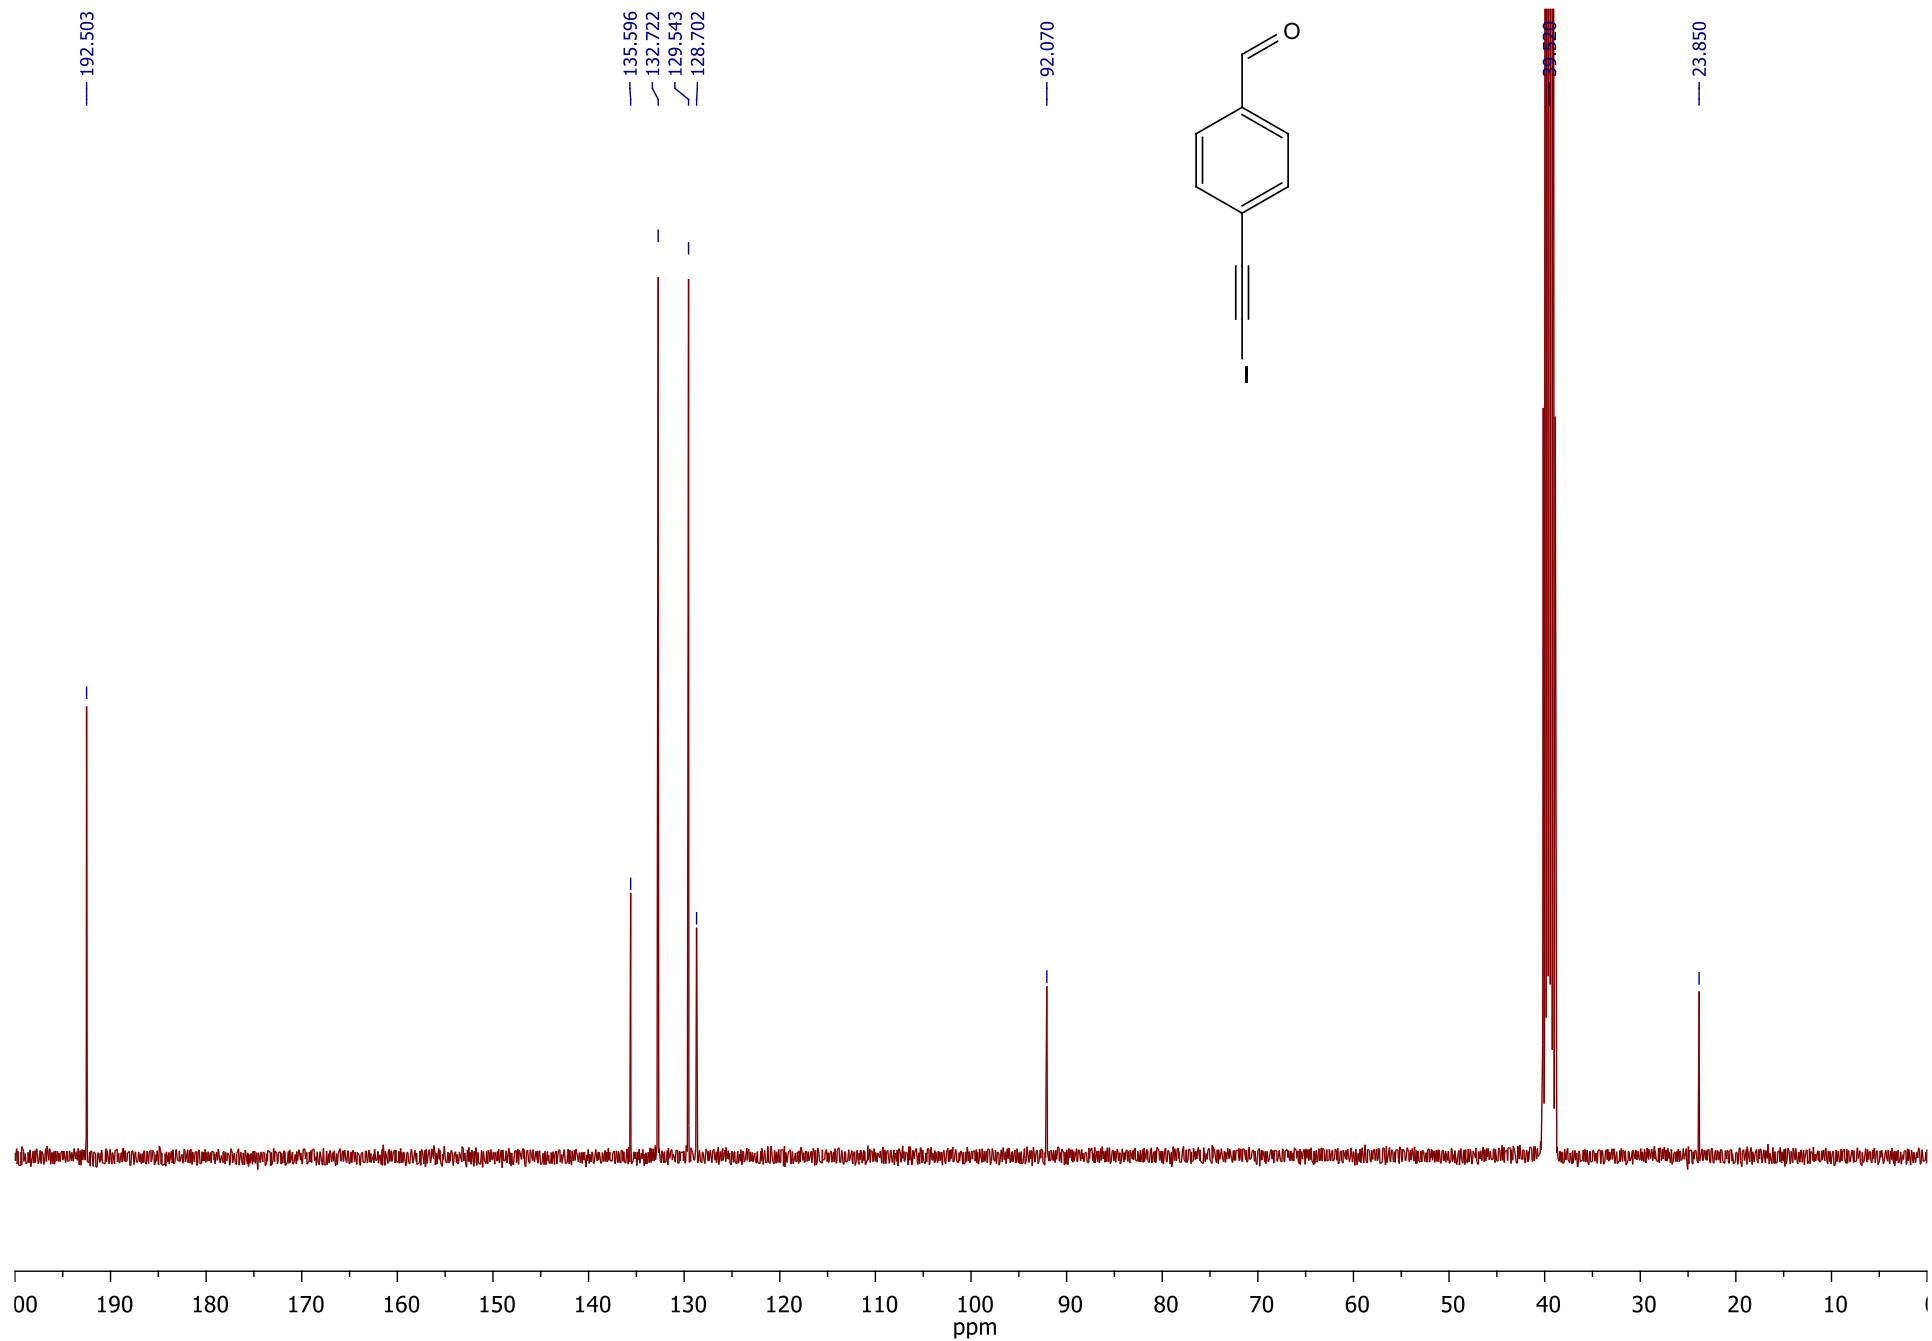

**Figure S10.**  $^{13}\text{C}\{^1\text{H}\}$  spectrum ( $\text{DMSO-d}_6$ ) of 4-(iodoethynyl)benzaldehyde (7).

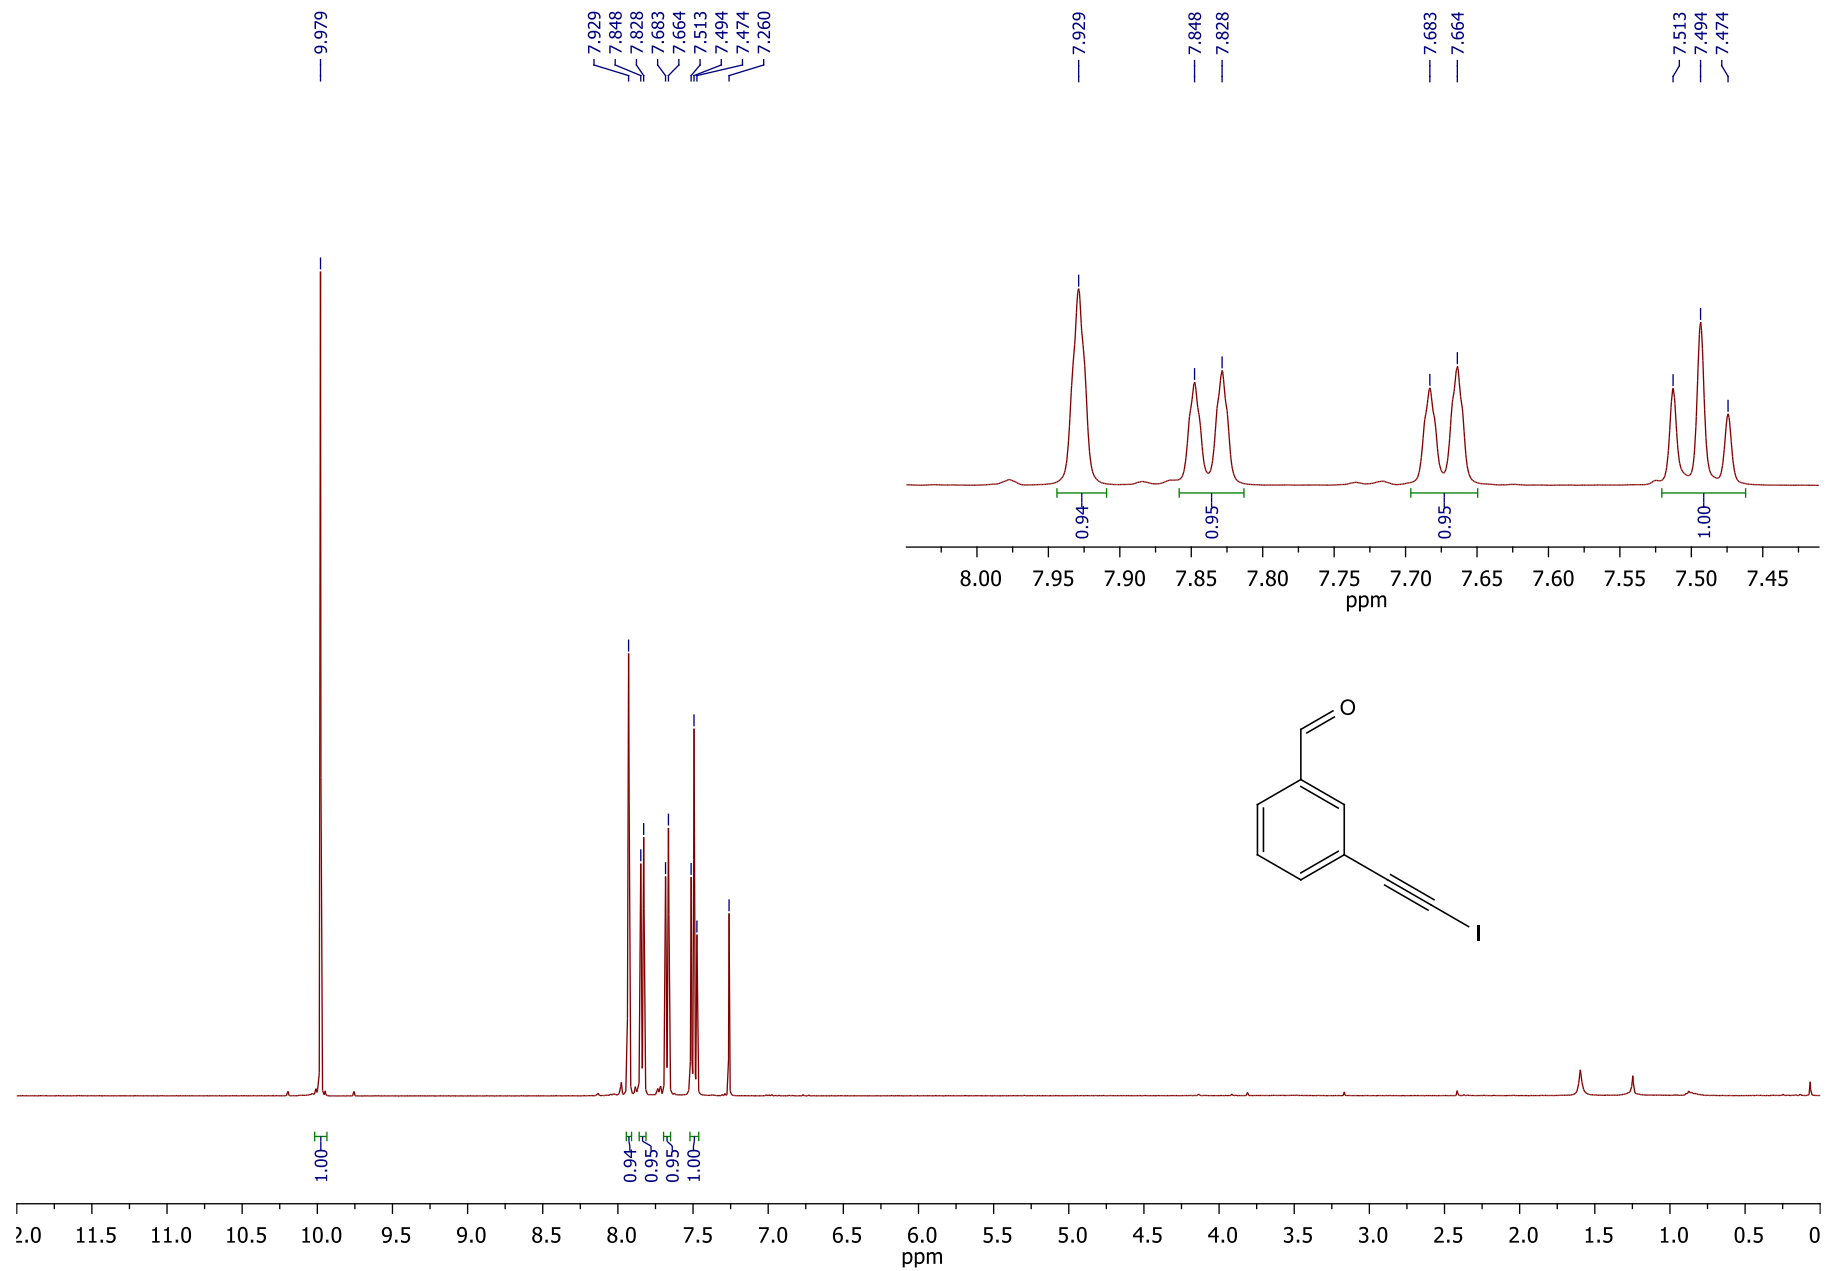

**Figure S11.** <sup>1</sup>H NMR spectrum (CDCl<sub>3</sub>) of 3-(iodoethynyl)benzaldehyde (**8**).

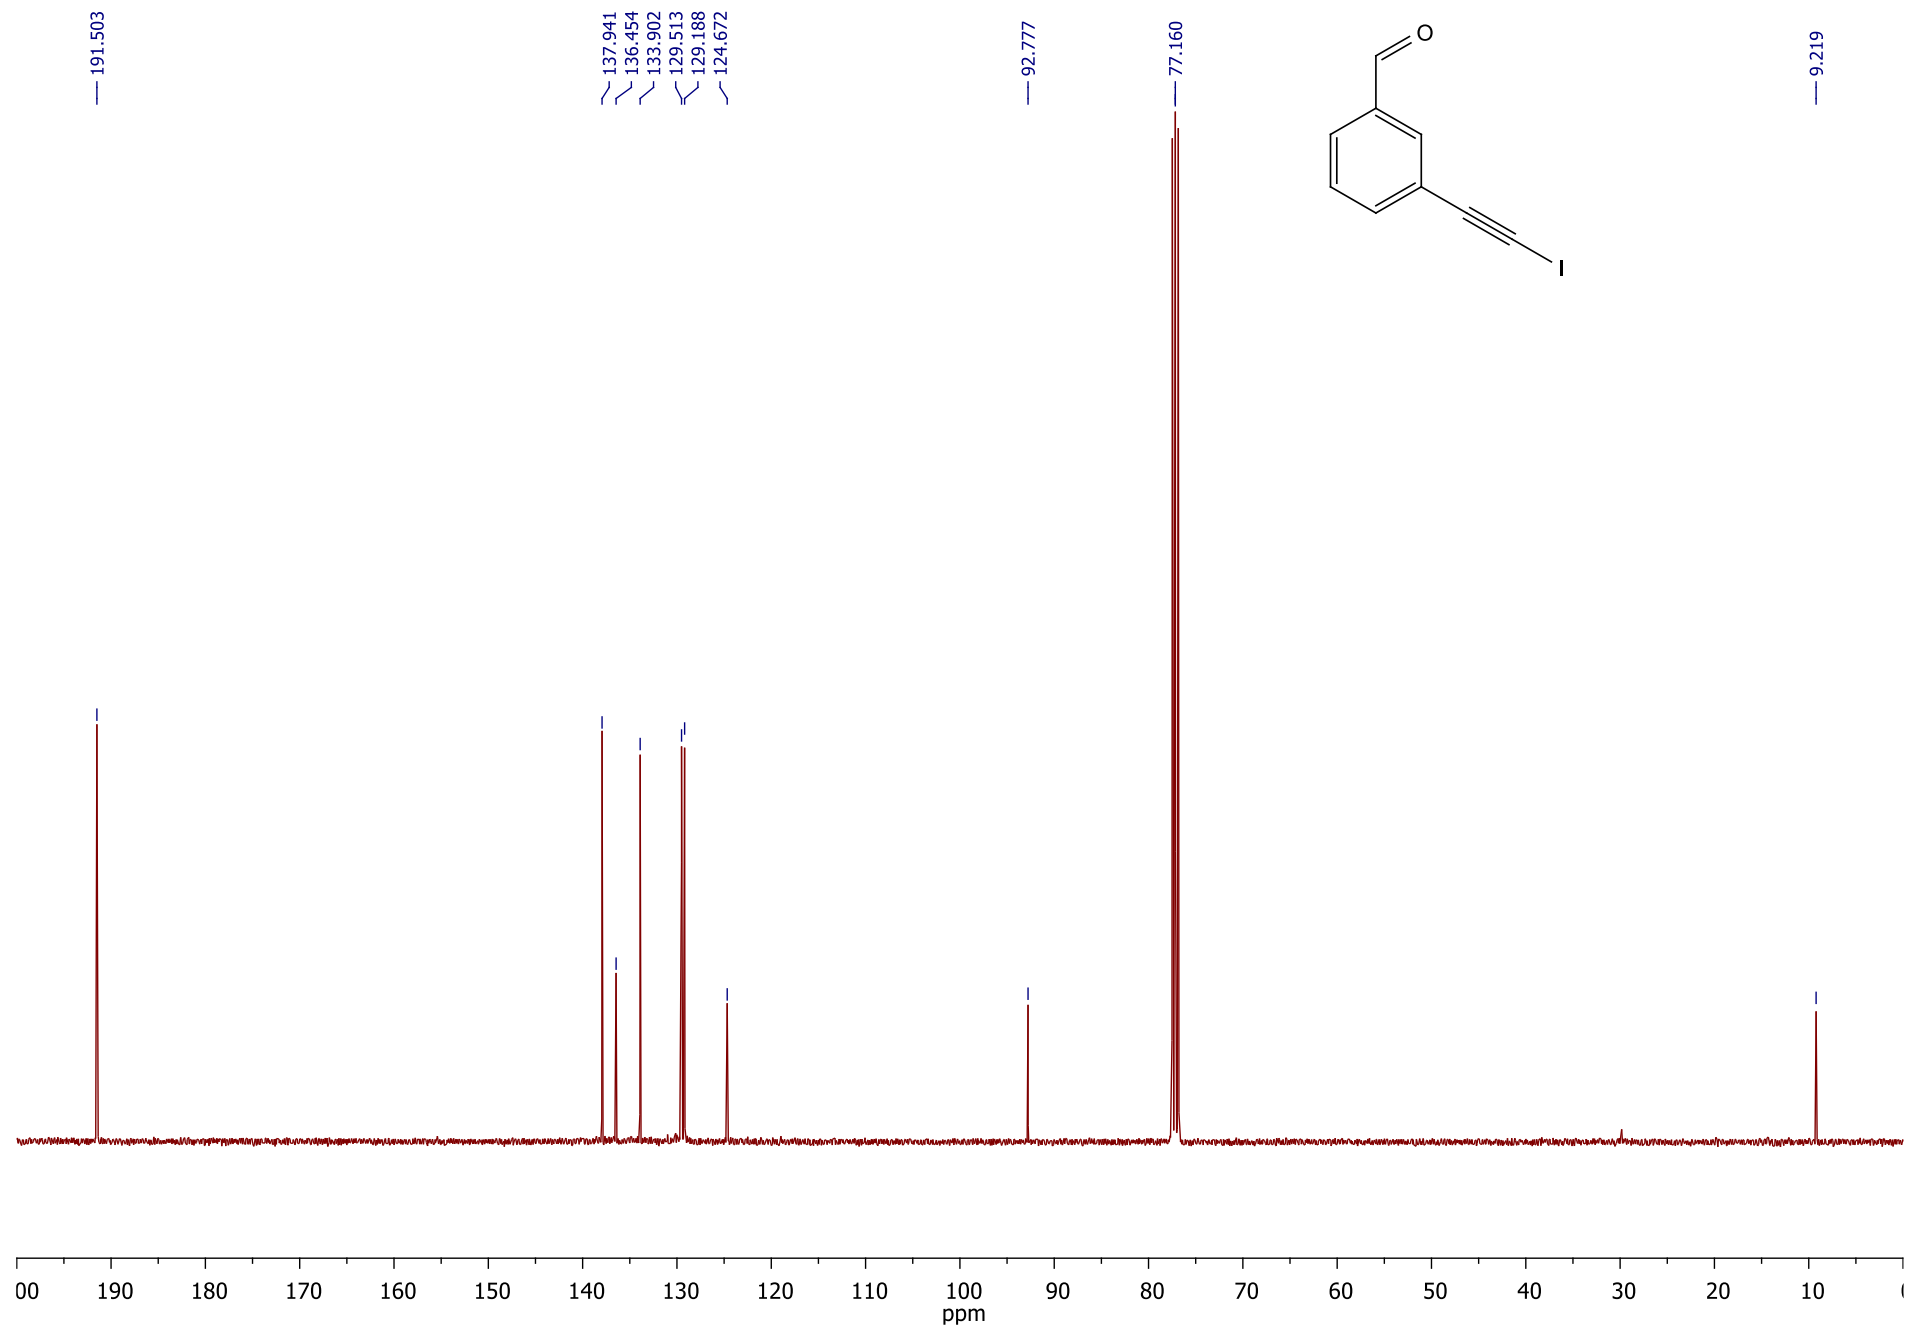

Figure S12.  $^{13}\text{C}\{^1\text{H}\}$  spectrum (CDCl<sub>3</sub>) of 3-(iodoethynyl)benzaldehyde (8).

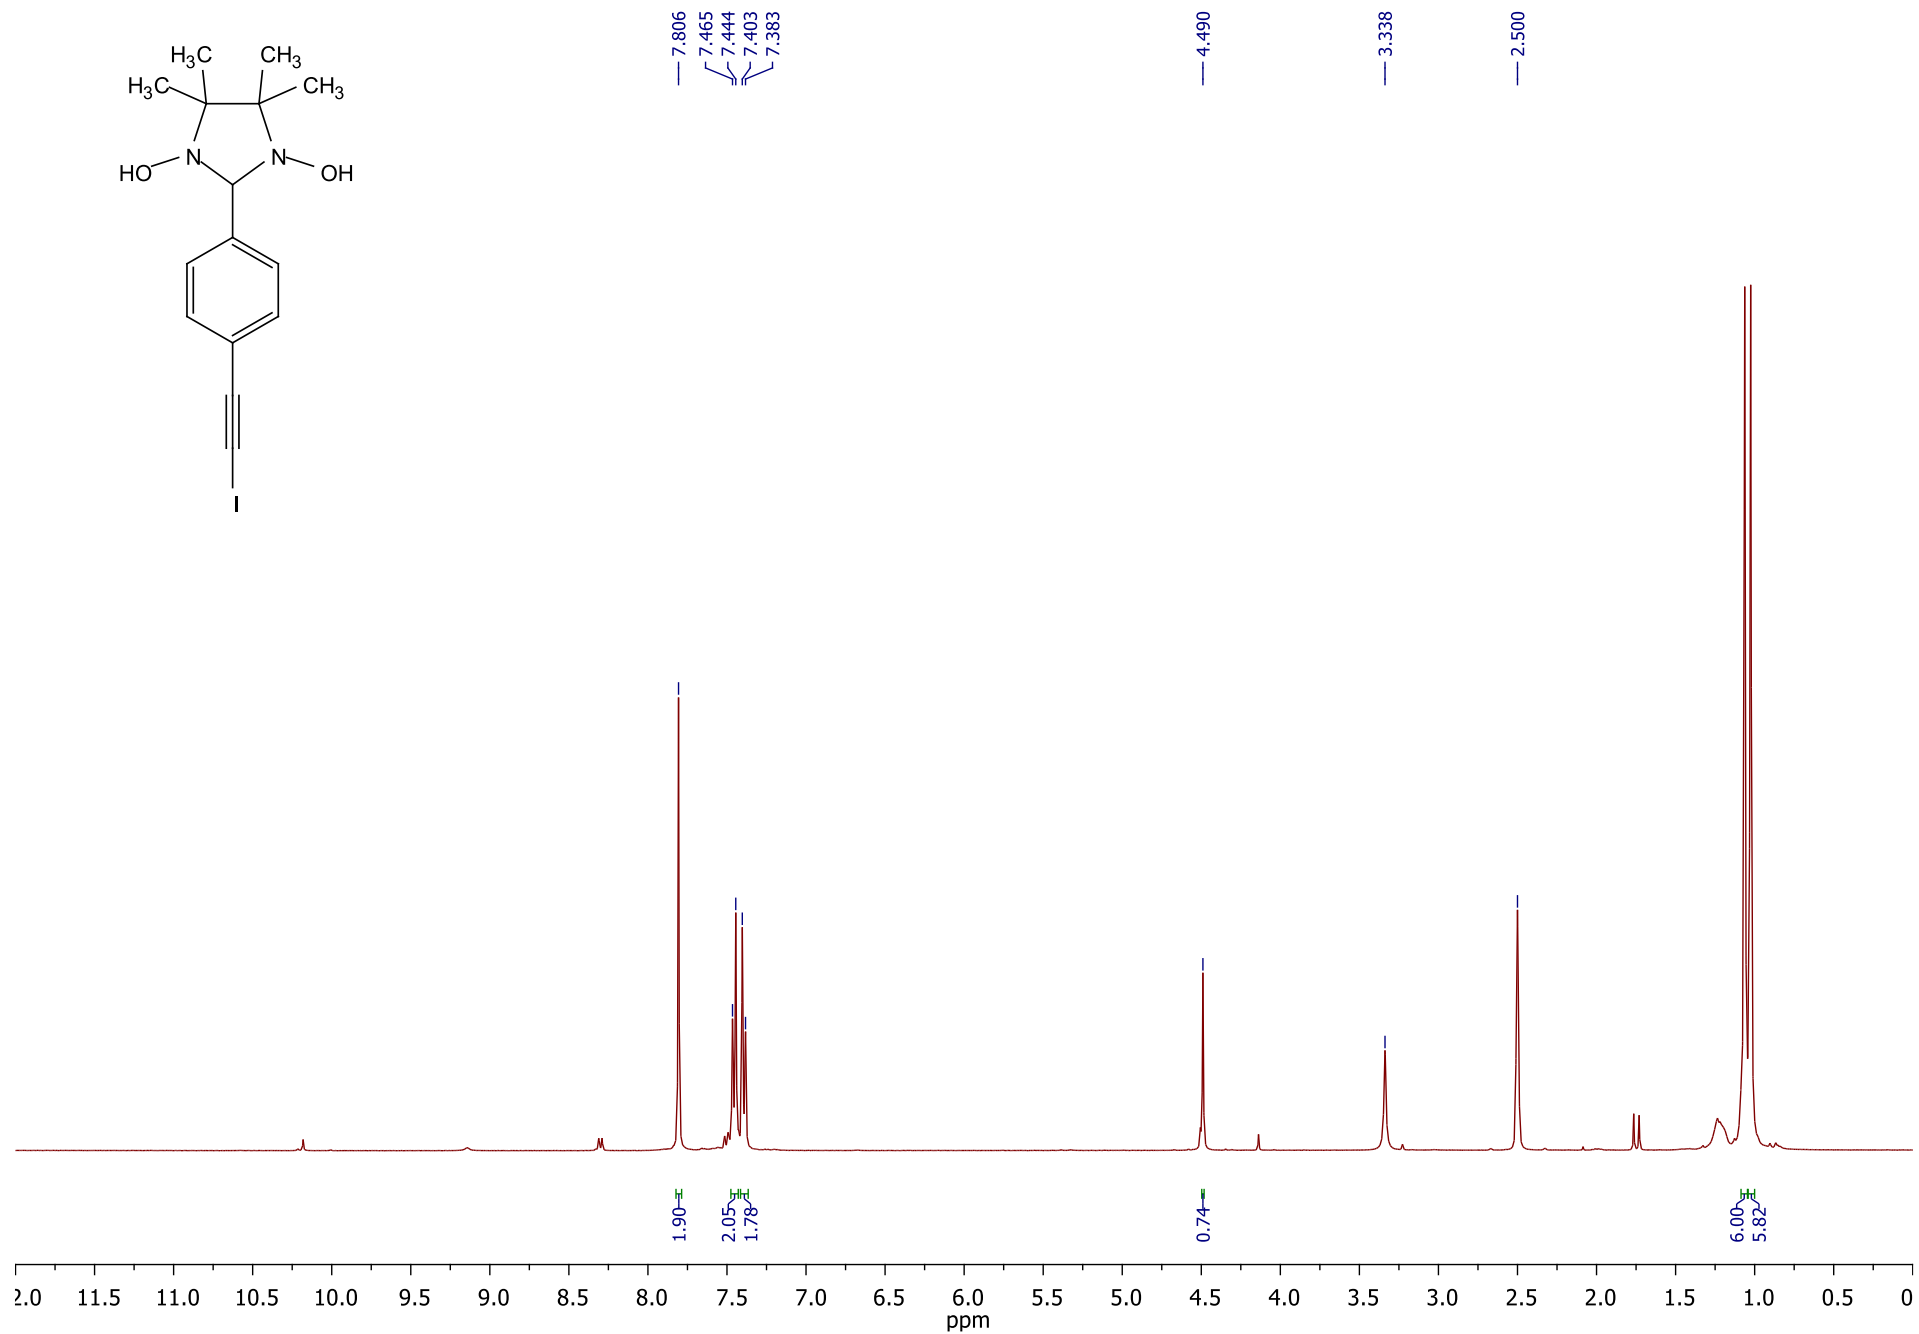

**Figure S13.** <sup>1</sup>H NMR spectrum (DMSO-d<sub>6</sub>) of 2-(4-iodoethynyl)-4,4,5,5-tetramethylimidazolidine-1,3-diol (**9**).

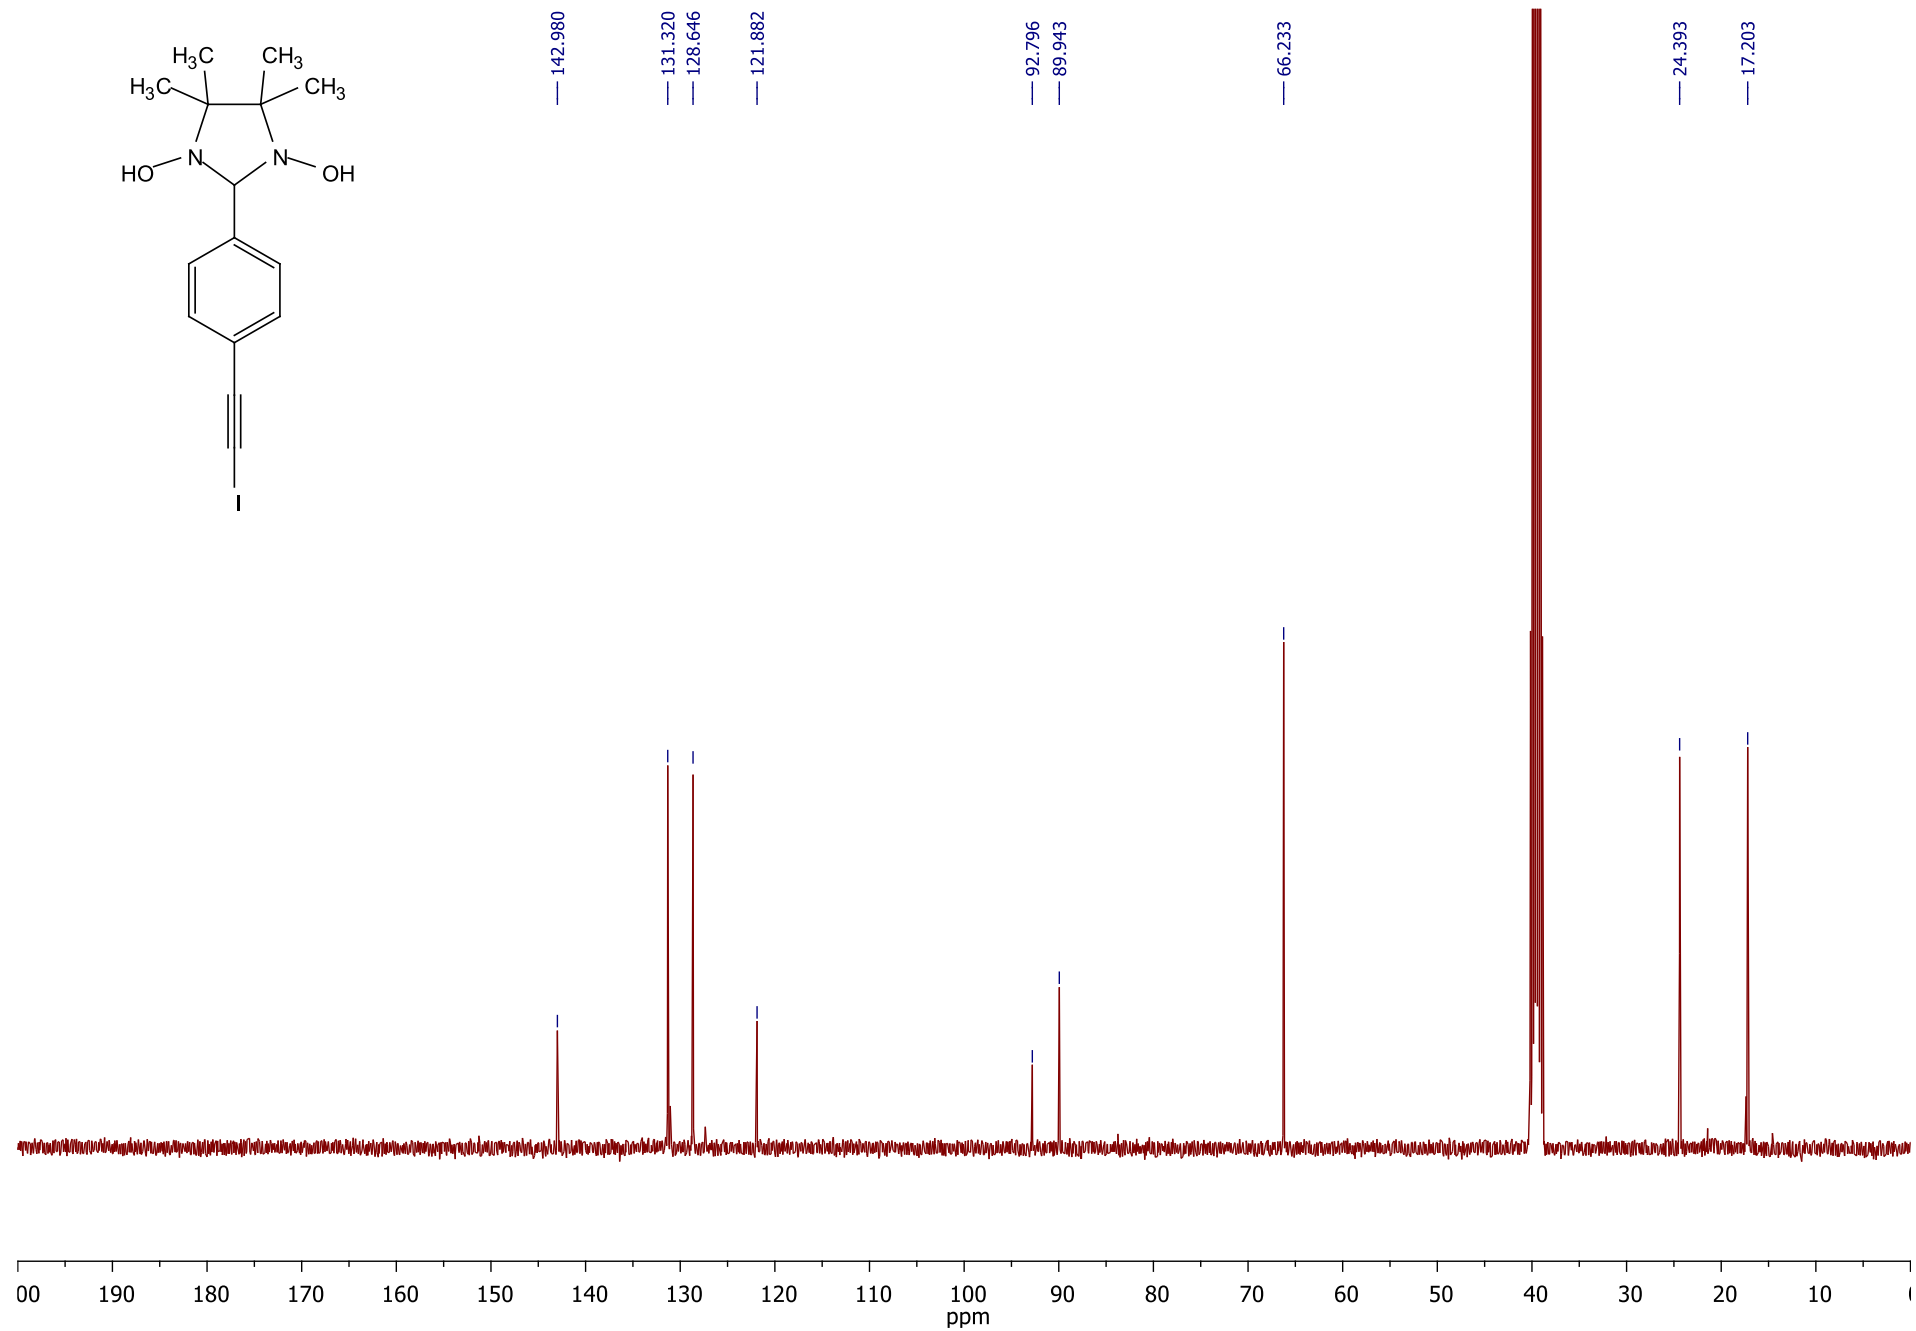

**Figure S14.**  $^{13}\text{C}\{^1\text{H}\}$  spectrum ( $\text{DMSO-d}_6$ ) of 2-(4-iodoethynyl)-4,4,5,5-tetramethylimidazolidine-1,3-diol (**9**).

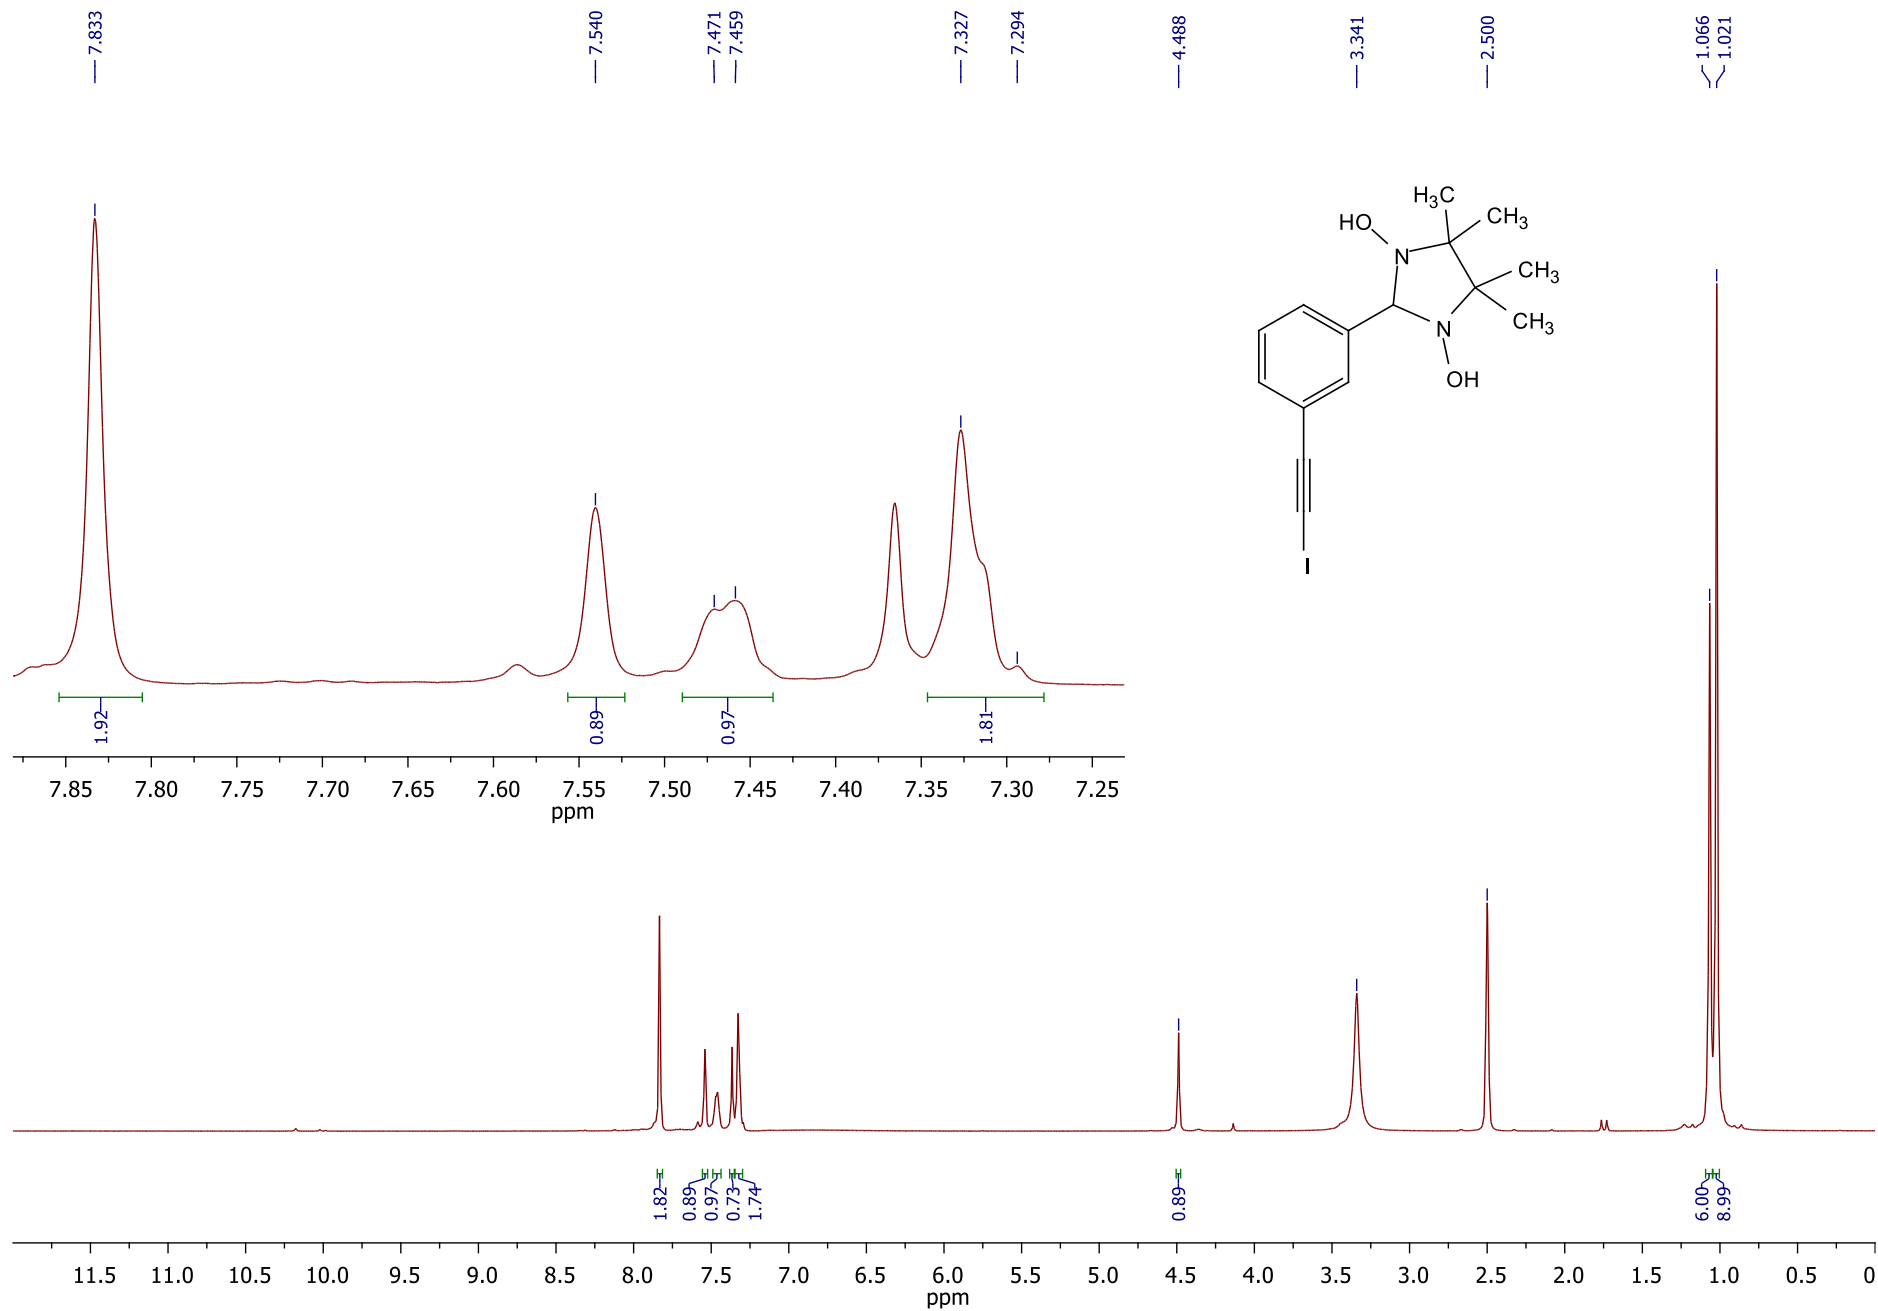

**Figure S15.** <sup>1</sup>H NMR spectrum (DMSO-d<sub>6</sub>) of 2-(3-iodoethynyl)-4,4,5,5-tetramethylimidazolidine-1,3-diol (**10**).

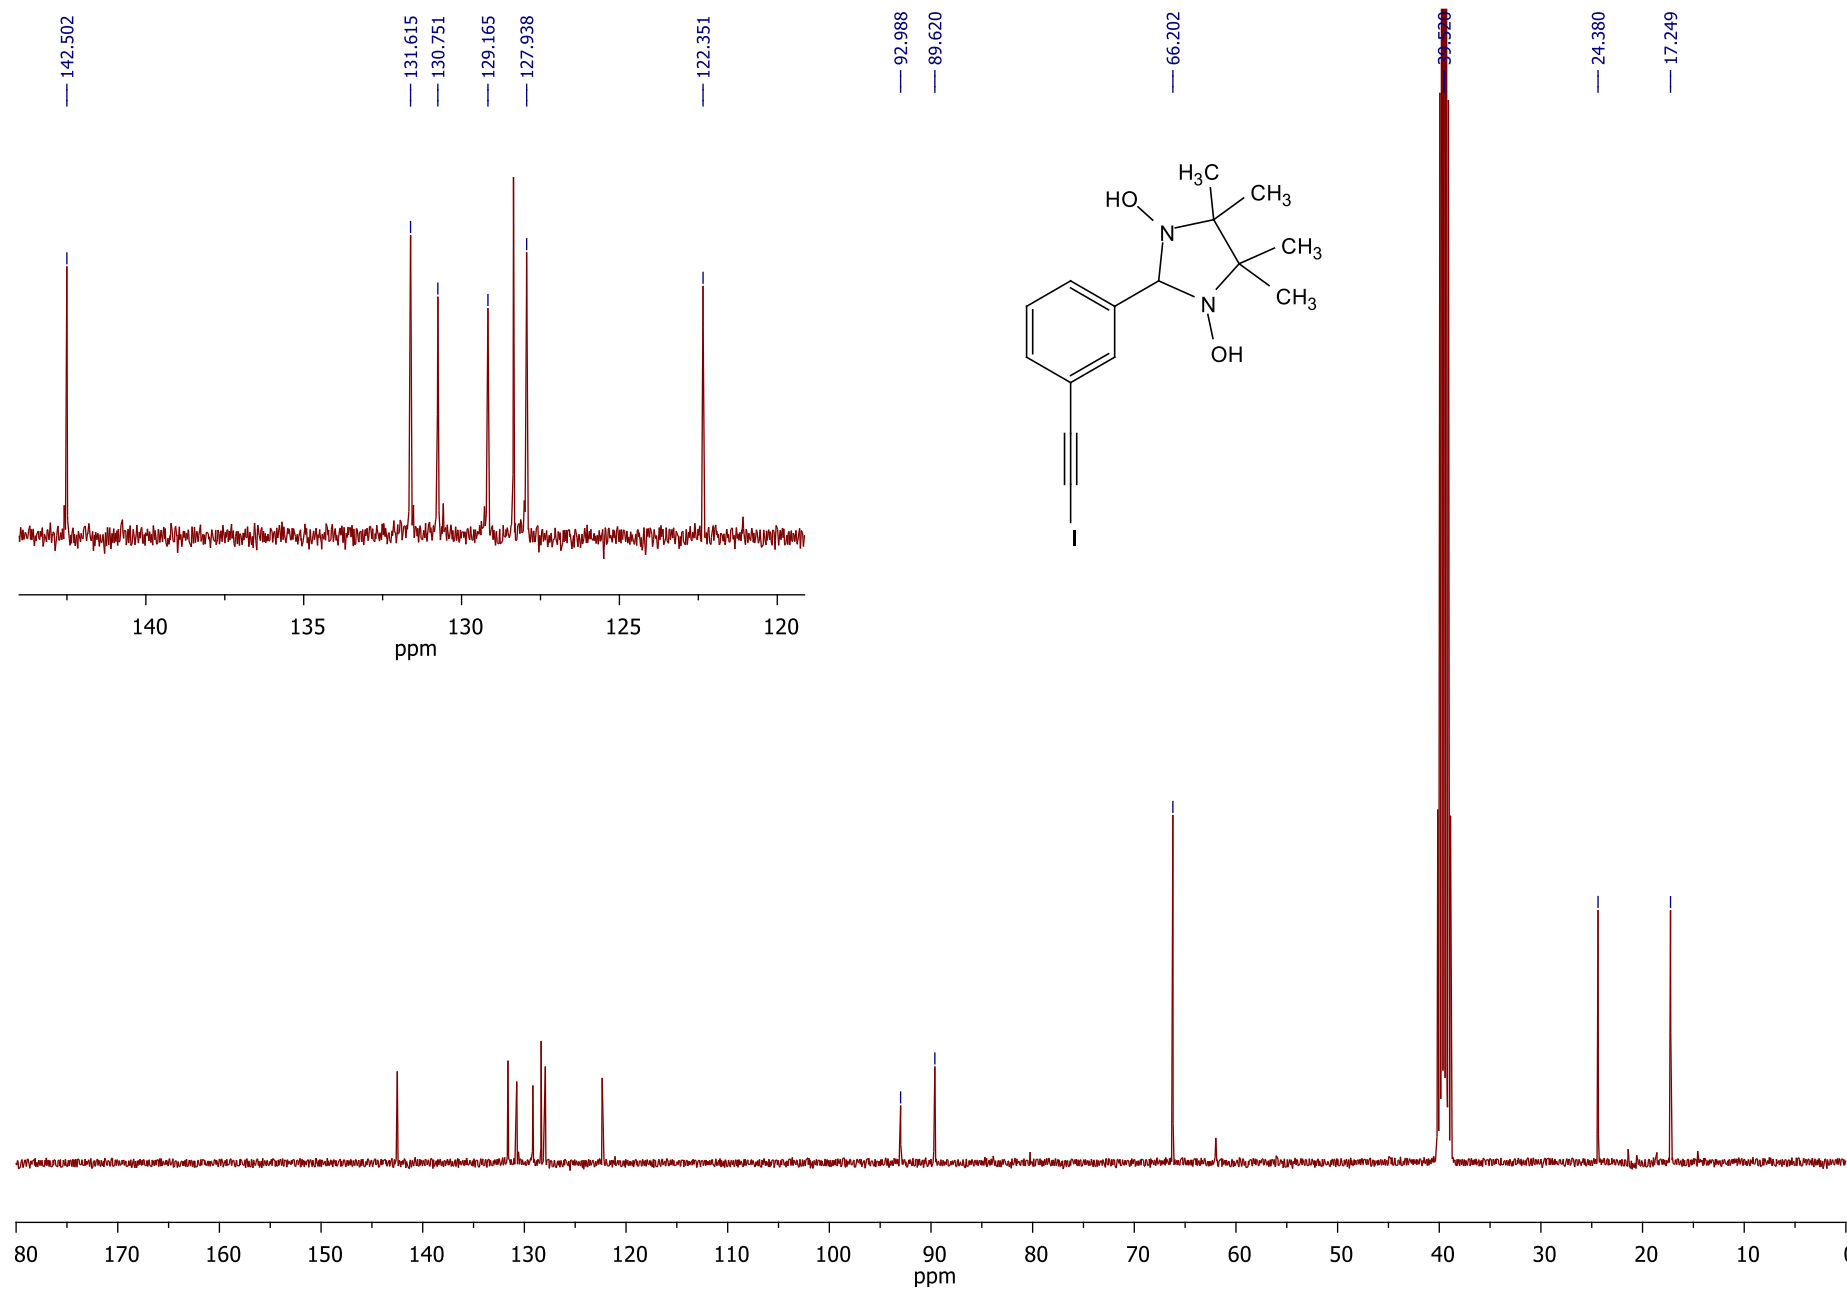

**Figure S16.**  $^{13}\text{C}\{^1\text{H}\}$  spectrum ( $\text{DMSO-d}_6$ ) of 2-(3-iodoethynyl)-4,4,5,5-tetramethylimidazolidine-1,3-diol (**10**).
